# Supplementary material for: Cyclic AMP‐hydrolyzing phosphodiesterase inhibitors potentiate statin‐induced cancer cell death
Source: PubMed Central journal article supplement (PMC7530792; doi:10.1002/1878-0261.12775), 2020-08-25
Supplement: MOL2-14-2533-s001.pdf [file MOL2-14-2533-s001.pdf]

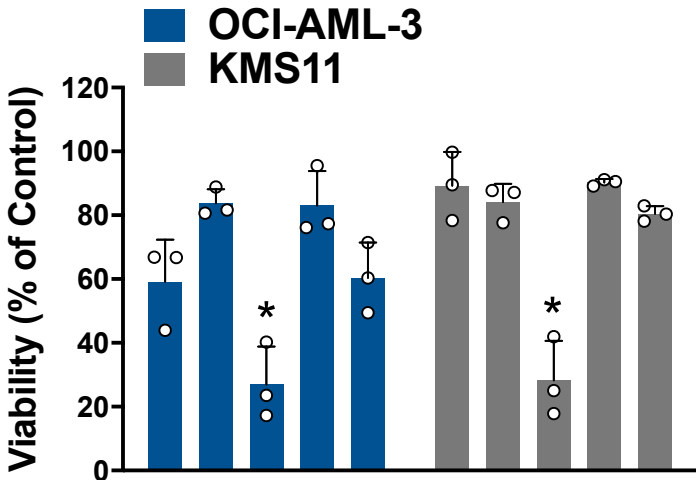

|             |   |   |   |   |   |   |   |   |   |   |
|-------------|---|---|---|---|---|---|---|---|---|---|
| Fluvastatin | + | - | + | + | + | + | - | + | + | + |
| Cilostazol  | - | + | + | + | + | - | + | + | + | + |
| Mevalonate  | - | - | - | + | - | - | - | - | + | - |
| GGPP        | - | - | - | - | + | - | - | - | - | + |
