# Supplementary material for: Cyclic AMP‐hydrolyzing phosphodiesterase inhibitors potentiate statin‐induced cancer cell death
Source: PubMed Central journal article supplement (PMC7530792; doi:10.1002/1878-0261.12775), 2020-08-25
Supplement: MOL2-14-2533-s002.pdf [file MOL2-14-2533-s002.pdf]

# OCI-AML-3

Intracellular cAMP  
(Fold change)

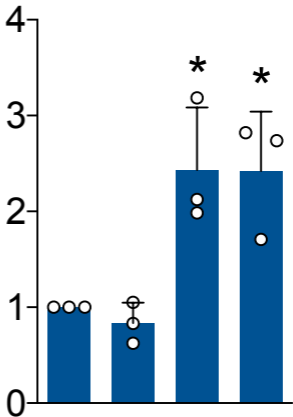

Fluvastatin  
Dipyridamole

- + - +  
- - + +
