# Supplementary material for: Cyclic AMP‐hydrolyzing phosphodiesterase inhibitors potentiate statin‐induced cancer cell death
Source: PubMed Central journal article supplement (PMC7530792; doi:10.1002/1878-0261.12775), 2020-08-25

**A*****HMGCS1***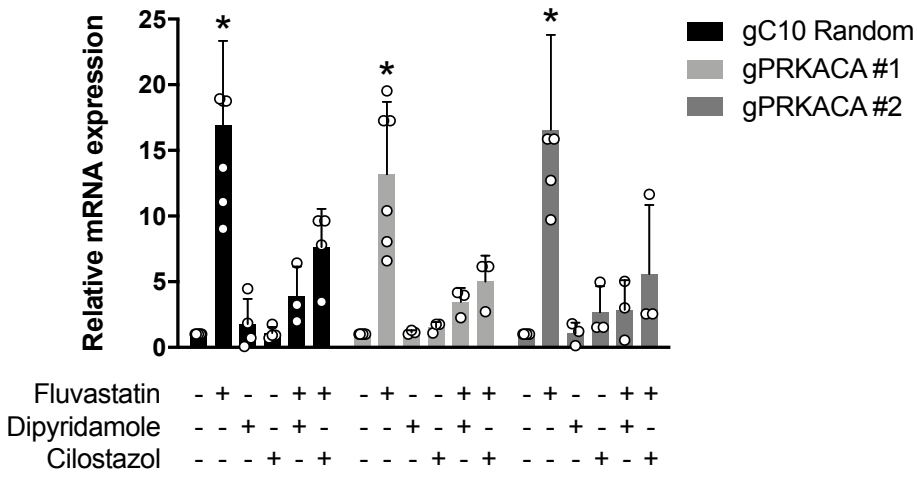**B**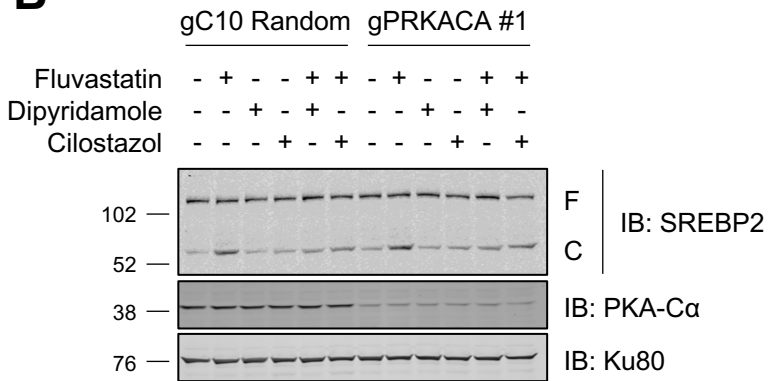

Supplement: MOL2-14-2533-s005.pdf [file MOL2-14-2533-s005.pdf]
